# Supplementary material for: Overexpression of an Osa-miR162a Derivative in Rice Confers Cross-Kingdom RNA Interference-Mediated Brown Planthopper Resistance without Perturbing Host Development
Source: MDPI journal article supplement (doi:10.3390/ijms222312652), 2021-11-23
Supplement: s1 [file s1]

## Supplementary Materials

### **Overexpression of an osa-miR162a derivative in rice confers cross-kingdom RNA interference-mediated brown planthopper resistance without perturbing host development**

Wenzhong Shen<sup>1</sup>, Shanni Cao<sup>1</sup>, Jinghui Liu<sup>1</sup>, Wenqing Zhang<sup>1</sup>, Jie Chen<sup>2\*</sup>,  
Jian-Feng Li<sup>1\*</sup>

<sup>1</sup> State Key Laboratory of Biocontrol, Guangdong Provincial Key Laboratory of Plant Resources, School of Life Sciences, Sun Yat-sen University, Guangzhou, Guangdong 510275, China.

<sup>2</sup> Guangdong Provincial Key Laboratory of High Technology for Plant Protection, Plant Protection Research Institute, Guangdong Academy of Agricultural Sciences, Guangzhou, Guangdong 510640, China.

\* Corresponding author

Tel: +86 20 39943513

Fax: +86 20 39943513

E-mail:

Jian-Feng Li: [lijfeng3@mail.sysu.edu.cn](mailto:lijfeng3@mail.sysu.edu.cn)

Wenqing Zhang: [lsszwq@mail.sysu.edu.cn](mailto:lsszwq@mail.sysu.edu.cn)

Jie Chen: [chenj@gdppri.com](mailto:chenj@gdppri.com)

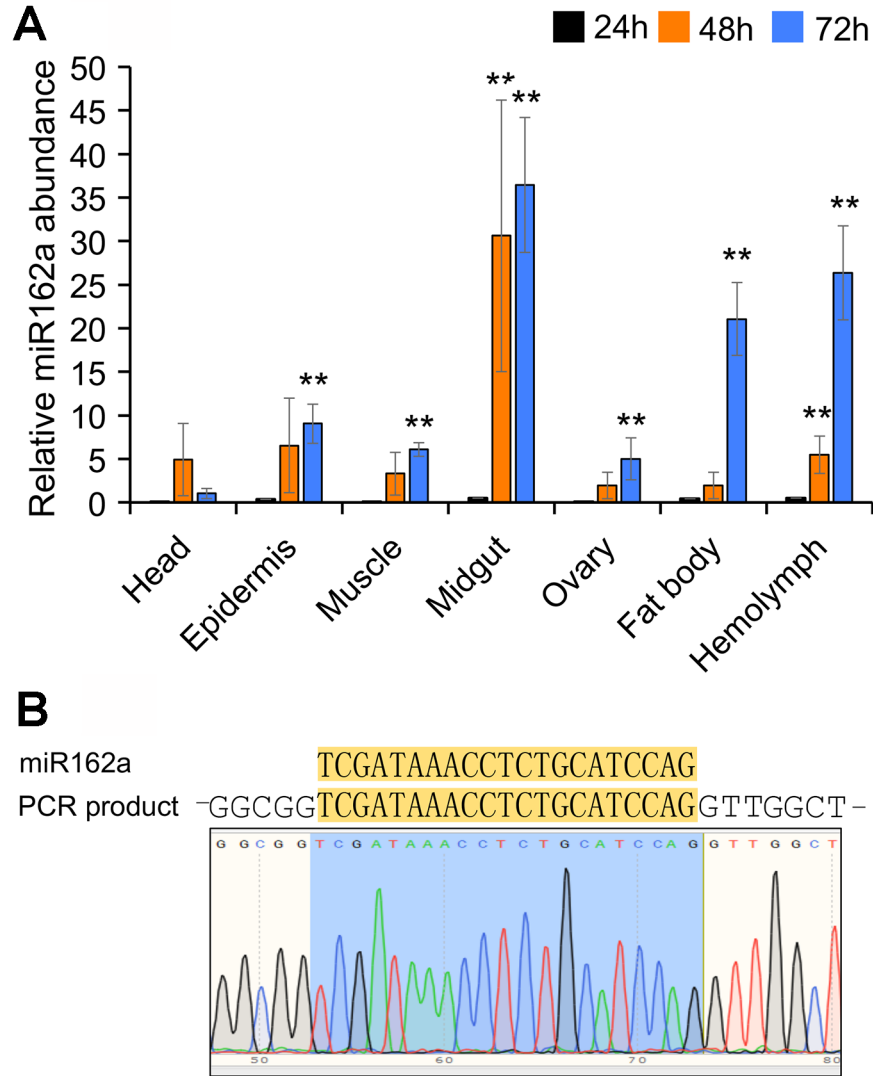

**Figure S1.** osa-miR162a can be detected in multiple tissues of BPH through artificial diet feeding. (A) Time course analysis of the osa-miR162a presence in various tissues of BPH feeding on osa-miR162a-containing artificial diets. The artificial diets contain synthetic osa-miR162a mimics at a concentration of 100 ng/ $\mu$ l. The abundances of osa-miR162a were determined by stem-loop RT-qPCR and the data were presented as mean  $\pm$  SD of three biological replicates. The abundance of osa-miR162a in the head after 24 h feeding were normalized as 1. (B) Sanger sequencing of mixed PCR products validates the presence of osa-miR162a inside BPH.

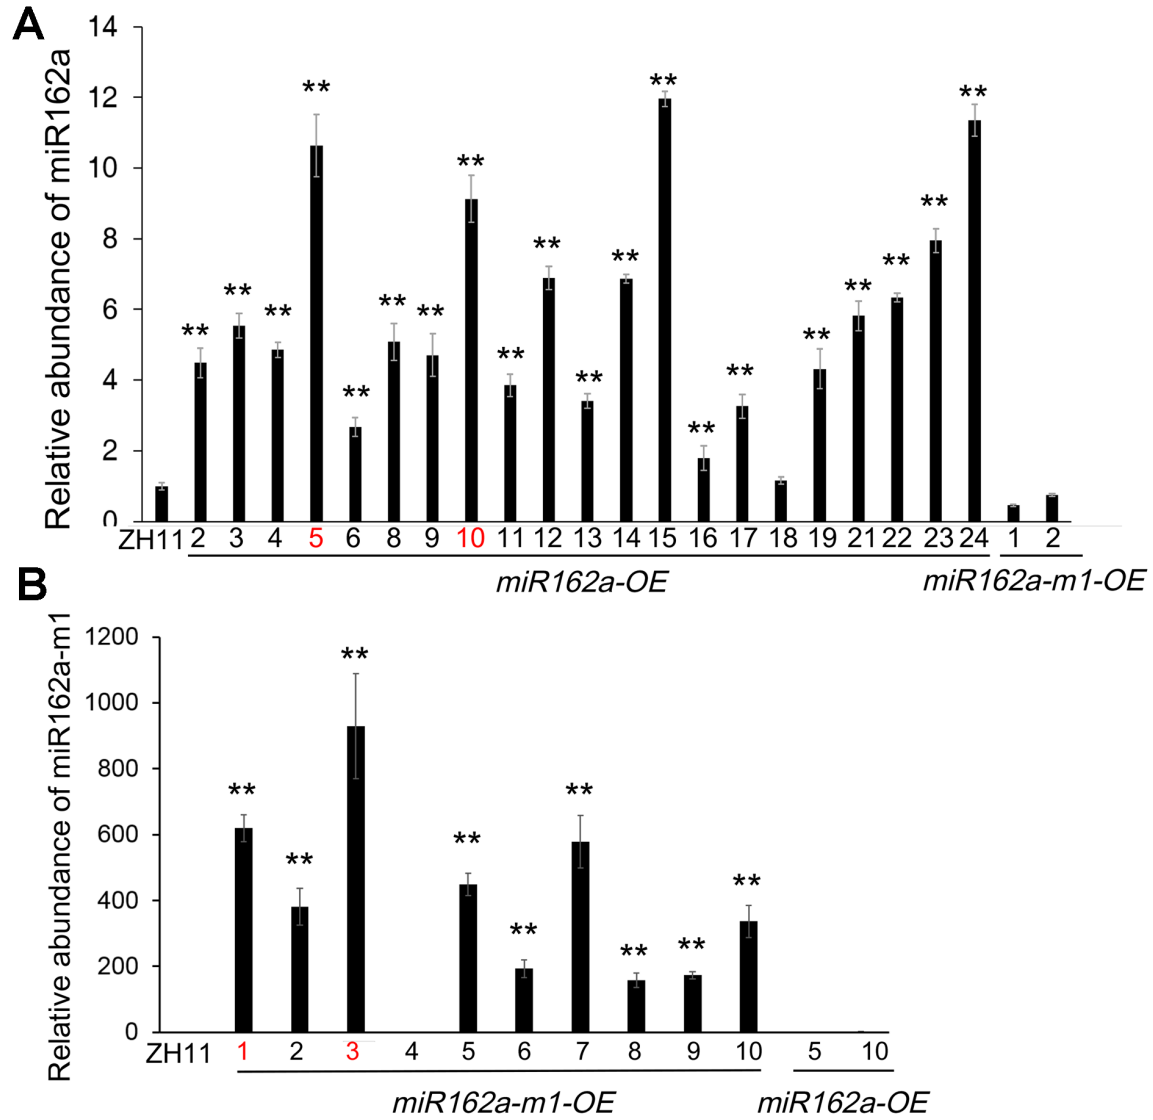

**Figure S2.** Evaluation of osa-miR162a or osa-miR162a-m1 overproduction in transgenic rice lines. (A) Evaluation of osa-miR162a expression levels in the leaf sheaths of independent T1 *miR162a-OE* lines. The abundances of mature miRNAs were analyzed by stem-loop RT-qPCR. Two *miR162a-m1-OE* lines were assayed as a control to indicate the specificity of qPCR primers used in the experiment. (B) Evaluation of osa-miR162a-m1 expression levels in the leaf sheaths of independent T1 *miR162a-m1-OE* lines. Two *miR162a-OE* lines were assayed as a control to indicate the specificity of qPCR primers used in the experiment. For (A) and (B), the data were presented as mean  $\pm$  SD of three biological replicates. Two *miRNA-OE* lines used for further analysis are indicated in red.

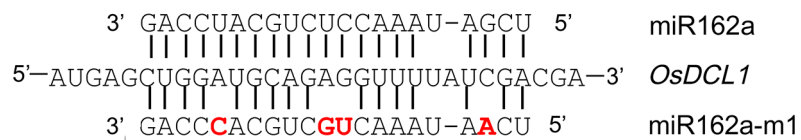

**Figure S3.** osa-miR162a and osa-miR162a-m1 have two or six mismatches, respectively, to *OsDCL1*. The modified nucleotides in osa-miR162a-m1 are highlighted in red.

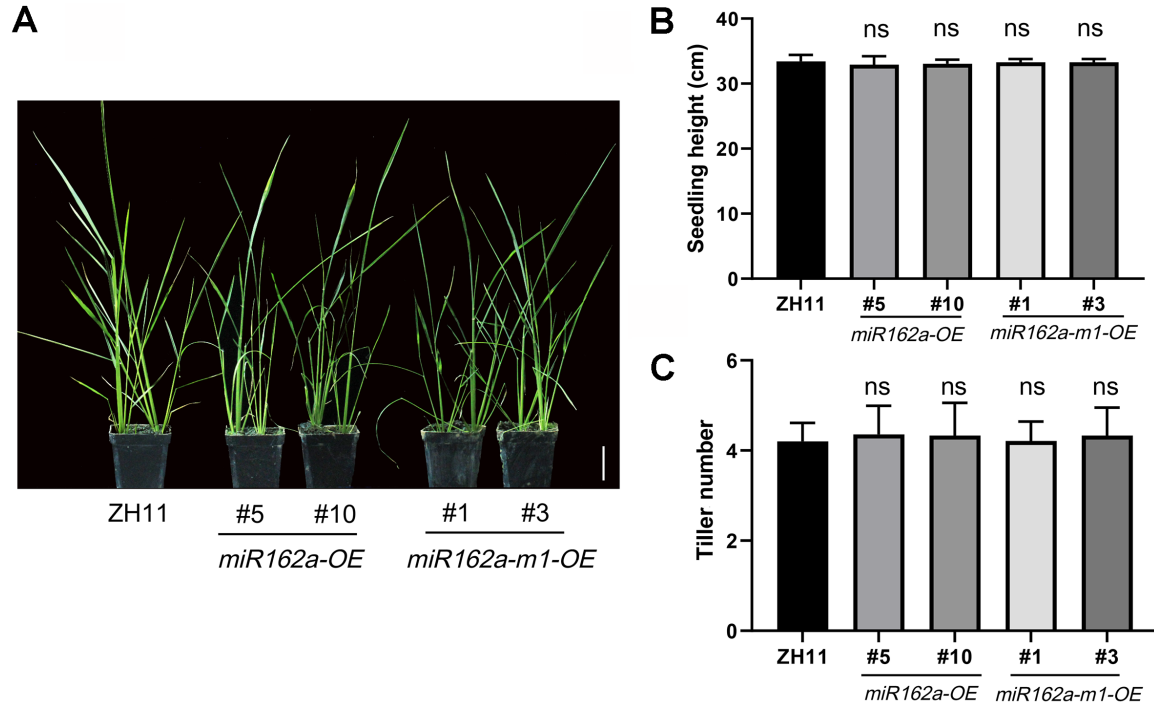

**Figure S4.** One-month-old *miR162a-OE* and *miR162a-m1-OE* plants exhibit overall wild-type appearances. (A) Representative image for one-month-old *miR162a-OE* and *miR162a-m1-OE* plants. Scale bar = 5 cm. (B, C) Quantification of plant heights (B) or tiller numbers (C) for one-month-old *miR162a-OE* and *miR162a-m1-OE* plants. Twenty randomly selected plants were evaluated and the data are shown as mean  $\pm$  SD. \*\*  $P < 0.01$  (student's  $t$ -test).

**Table S1.** The qPCR primers used in this study

|    |                   |                                                         |
|----|-------------------|---------------------------------------------------------|
| 1  | osa-miR162a-RT    | GTCGTATCCAGTGCAGGGTCCGAGGTATTTCGCACTGGATACG<br>ACCTGGAT |
| 2  | osa-162a-m1-RT    | GTCGTATCCAGTGCAGGGTCCGAGGTATTTCGCACTGGATACG<br>ACCTGGGT |
| 3  | osa-miR162a-m1-F  | GGCCGTCAATAAACTGCTGC                                    |
| 4  | osa-miR162a-F     | TGCGGTCGATAAACCTCTGC                                    |
| 5  | 162-universal-R   | GTGCAGGGTCCGAGGT                                        |
| 6  | miR162a_Target1_F | AGGGTGGGGTATGGACATGA                                    |
| 7  | miR162a_Target1_R | CCGTCCTTCTTGAGCCGATT                                    |
| 8  | miR162a_Target2_F | AGCACGAAACCTGCATCAGA                                    |
| 9  | miR162a_Target2_R | TTCAGATGCCTTCCCAACCC                                    |
| 10 | miR162a_Target3_F | GGAGACCACCAGGTCCAAG                                     |
| 11 | miR162a_Target3_R | TCGGCCCAATATCGTCATCC                                    |
| 12 | miR162a_Target4_F | GCTGGCCTGTGTTTGTCATC                                    |
| 13 | miR162a_Target4_R | GCCGGGATAATCAGGTCCAG                                    |
| 14 | miR162a_Target5_F | TGCTGAATATTTCCGCCCA                                     |
| 15 | miR162a_Target5_R | CCAAACCGGACCTGGTATCC                                    |
| 16 | miR162a_Target6_F | GCTGAGGACTCGTTCTGTTCA                                   |
| 17 | miR162a_Target6_R | AAGAACGGAAAACCTGGGCA                                    |
| 18 | miR162a_Target7_F | TATTTTGAGGGCGTCGTGGA                                    |
| 19 | miR162a_Target7_R | CGGCCTTGGTCTATCACCTG                                    |
| 20 | miR162a_Target8_F | GGCCCGTGGTGTTTCATATT                                    |
| 21 | miR162a_Target8_R | CACCTTCTCTAGCTGTTGAACAAA                                |
| 22 | Os18srRNA_F       | CTACGTCCCTGCCCTTTGTACA                                  |
| 23 | Os18srRNA_R       | ACACTTCACCGGACCATTCAA                                   |
| 24 | <i>NIGAPDH</i> _F | CAAGGTCATCTCCAACGCCT                                    |
| 25 | <i>NIGAPDH</i> _R | CAGCTTTCCAGAAGGTCCGT                                    |
| 26 | <i>NITOR</i> _F   | GCTGCTGACCATCCTACTGG                                    |
| 27 | <i>NITOR</i> _R   | TGTCTCGCGCCTGATAACAA                                    |
| 28 | <i>NIVg</i> _F    | GGCTCCGAGTCAAGTGACAA                                    |
| 29 | <i>NIVg</i> _R    | GTTGGCACCATCGTGGTAGA                                    |
| 30 | <i>NIS6K</i> _F   | TCACATACGTAGCGCCATCC                                    |
| 31 | <i>NIS6K</i> _R   | GTCCATCATTTTCGTCGTGCG                                   |
